# Supplementary material
Source: PubMed Central journal article supplement (PMC3069218)

# Fig. S1

## Normal Human Omentum

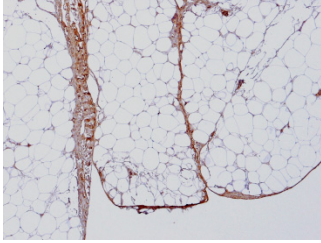

Fibronectin

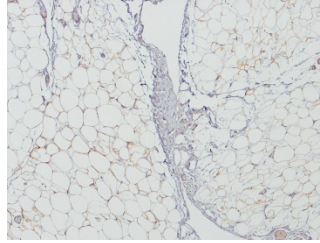

Collagen IV

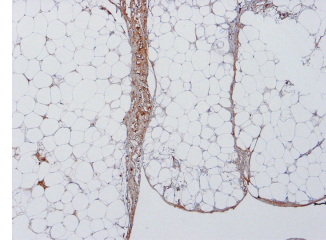

Vitronectin

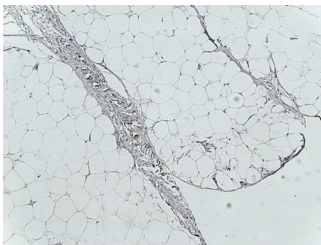

Laminin

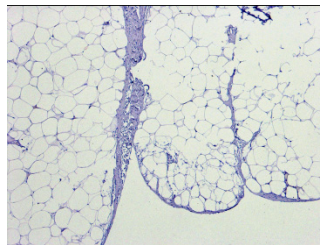

Negative Control

Fig. S2

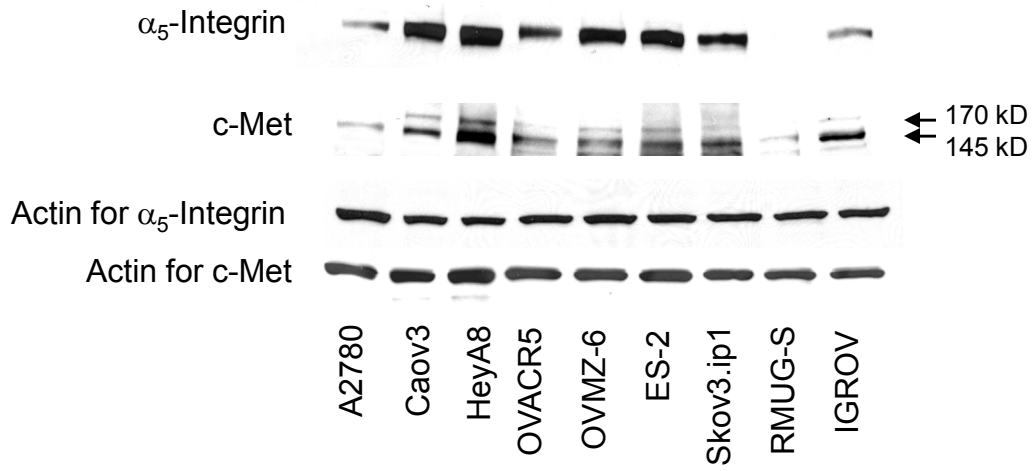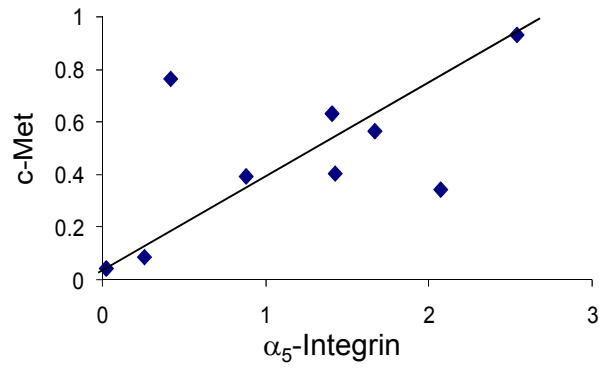

Fig. S3

**a**

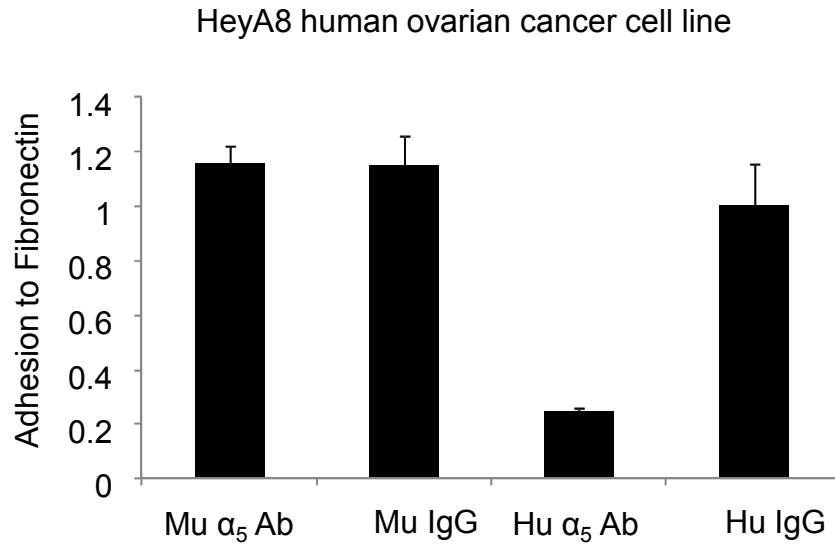

**b**

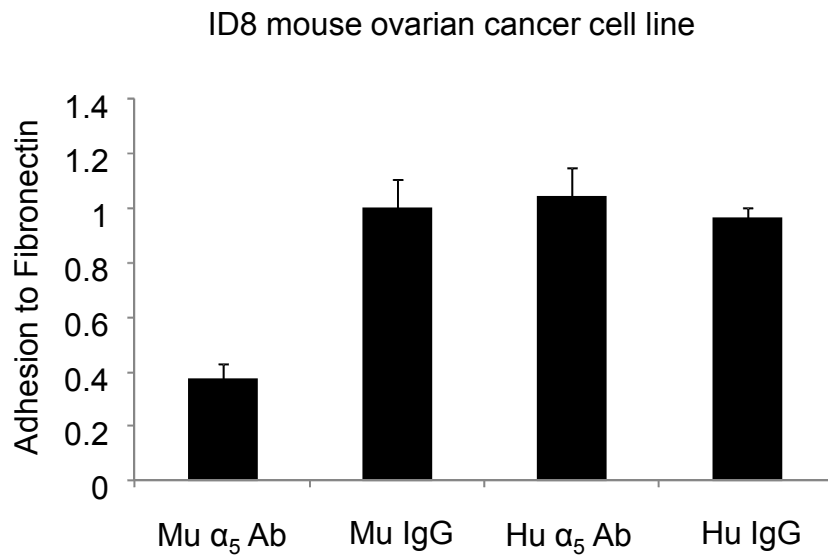

Fig. S4

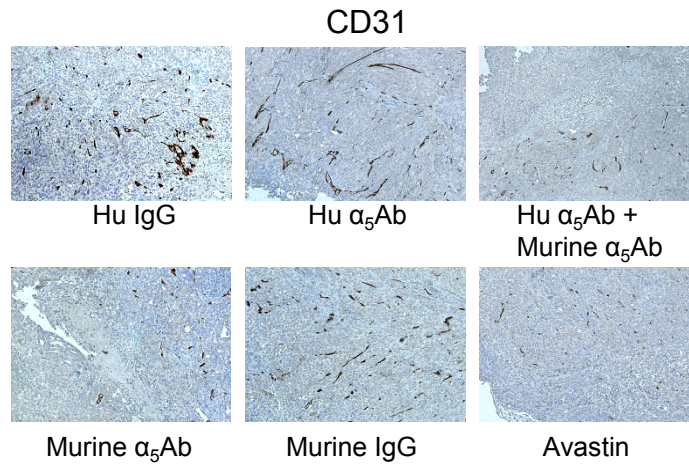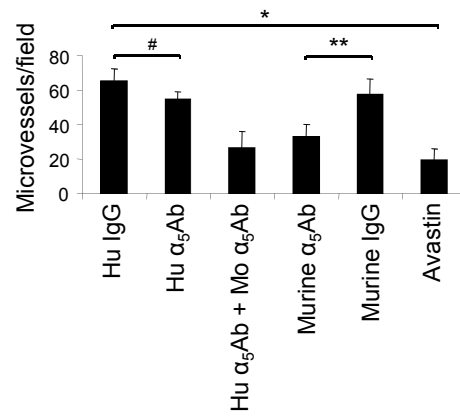

Fig. S5

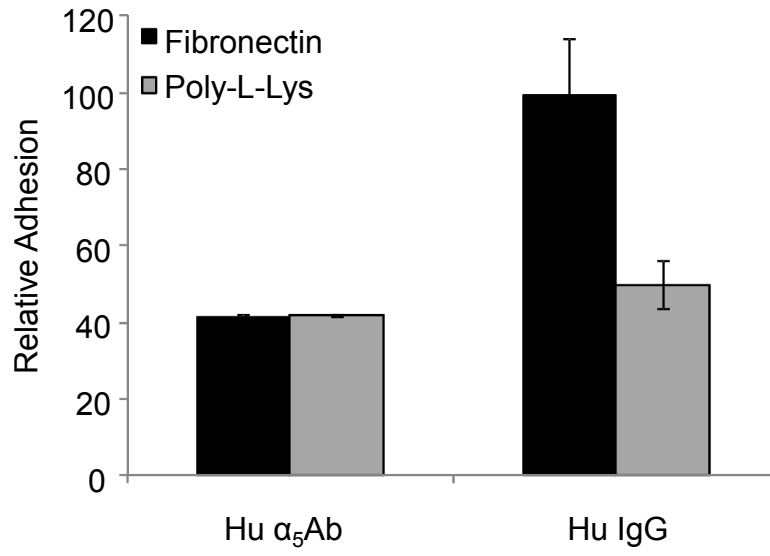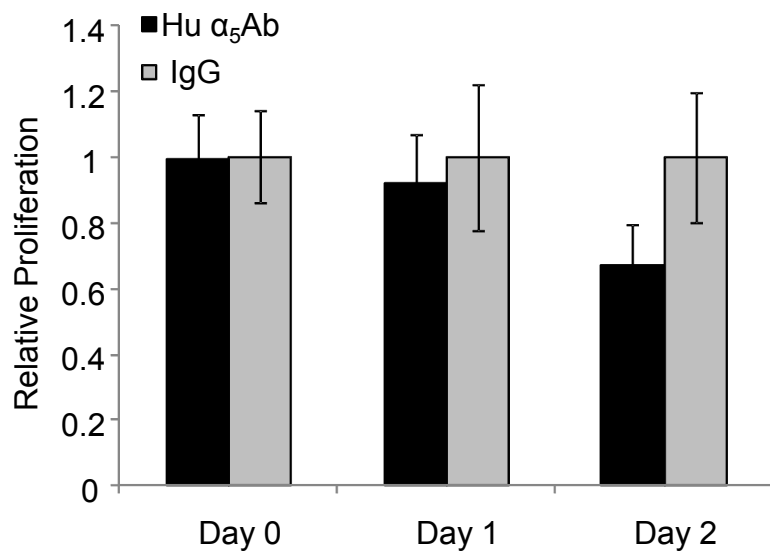

Fig. S6

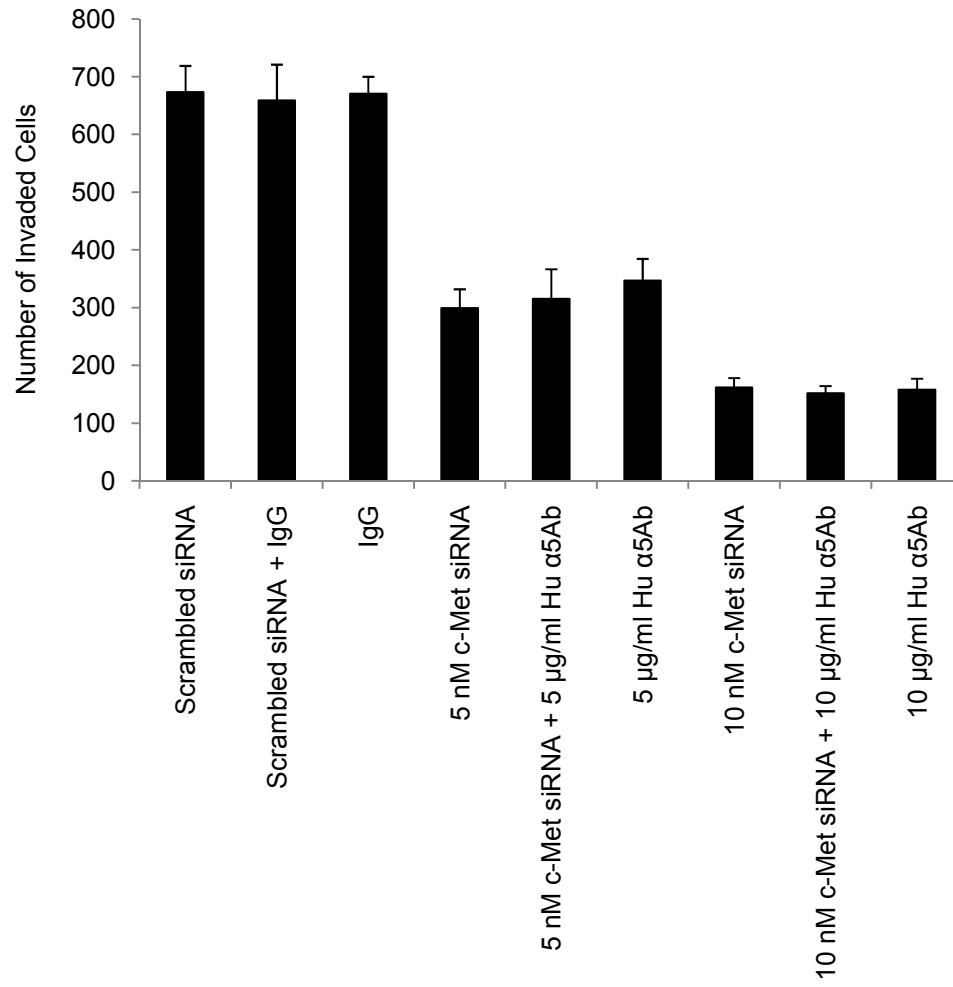

Fig. S7

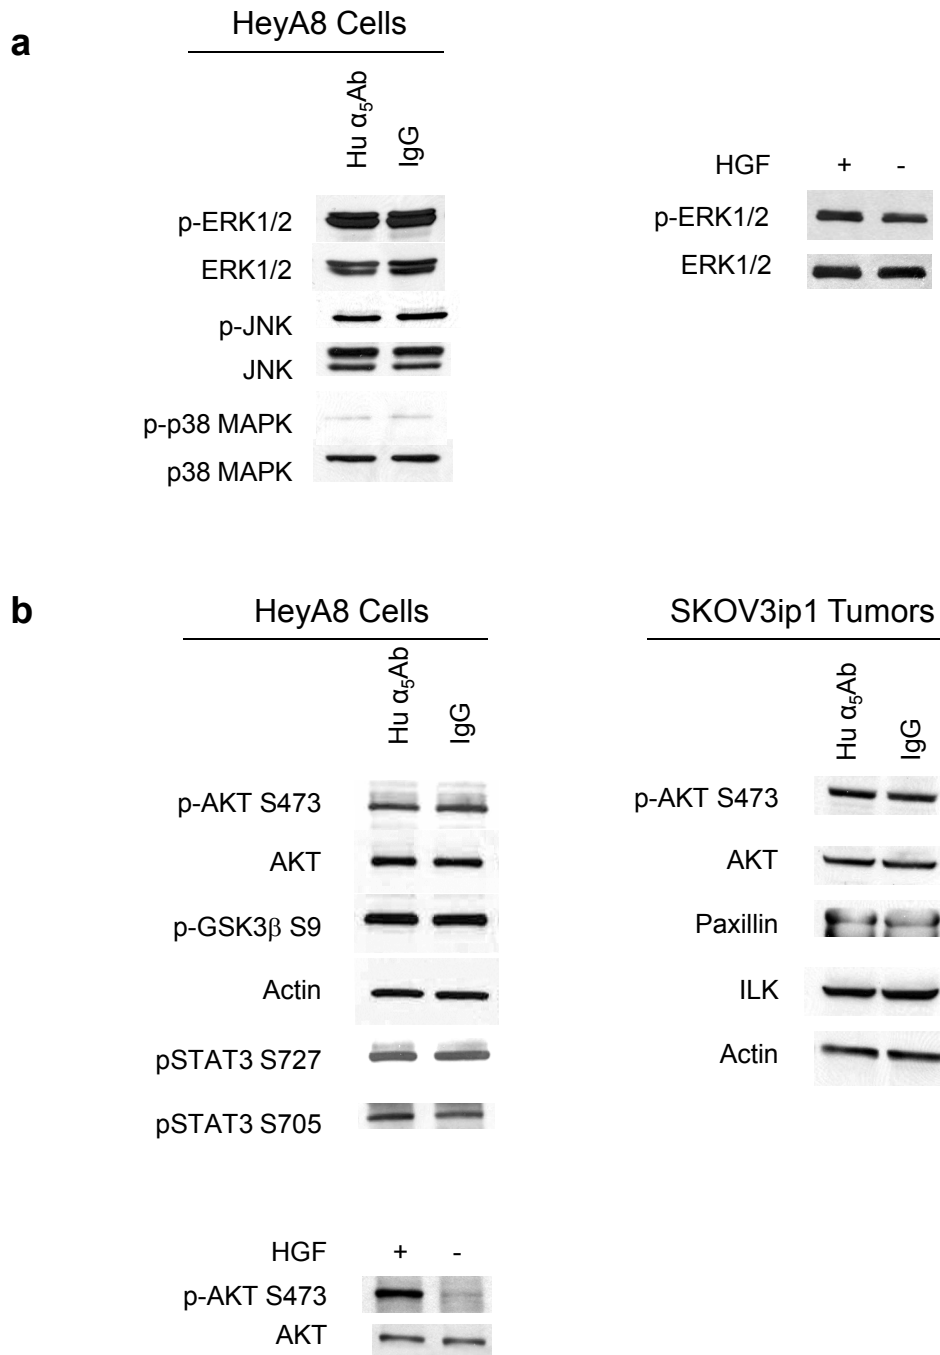

Fig. S8

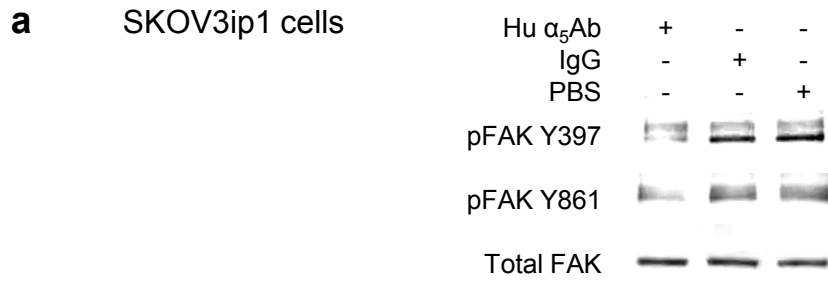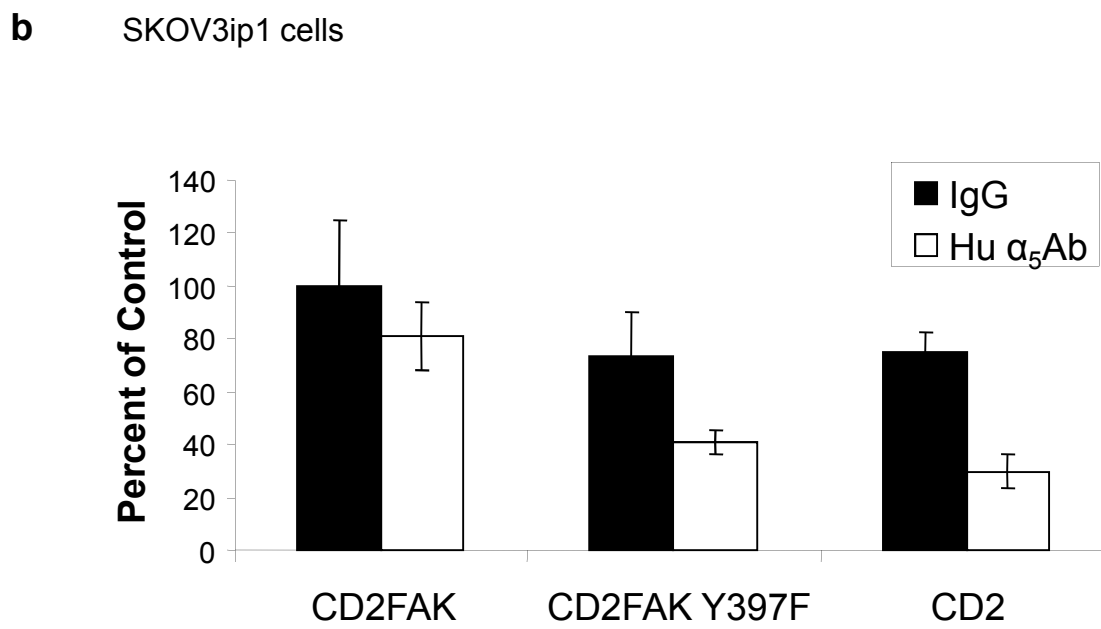

Supplement: NIHMS244406-supplement-2.pdf [file NIHMS244406-supplement-2.pdf]
